# Supplementary material
Source: PubMed Central journal article supplement (PMC3654374)
Supplement: NIHMS48755-supplement-1.pdf [file NIHMS48755-supplement-1.pdf]

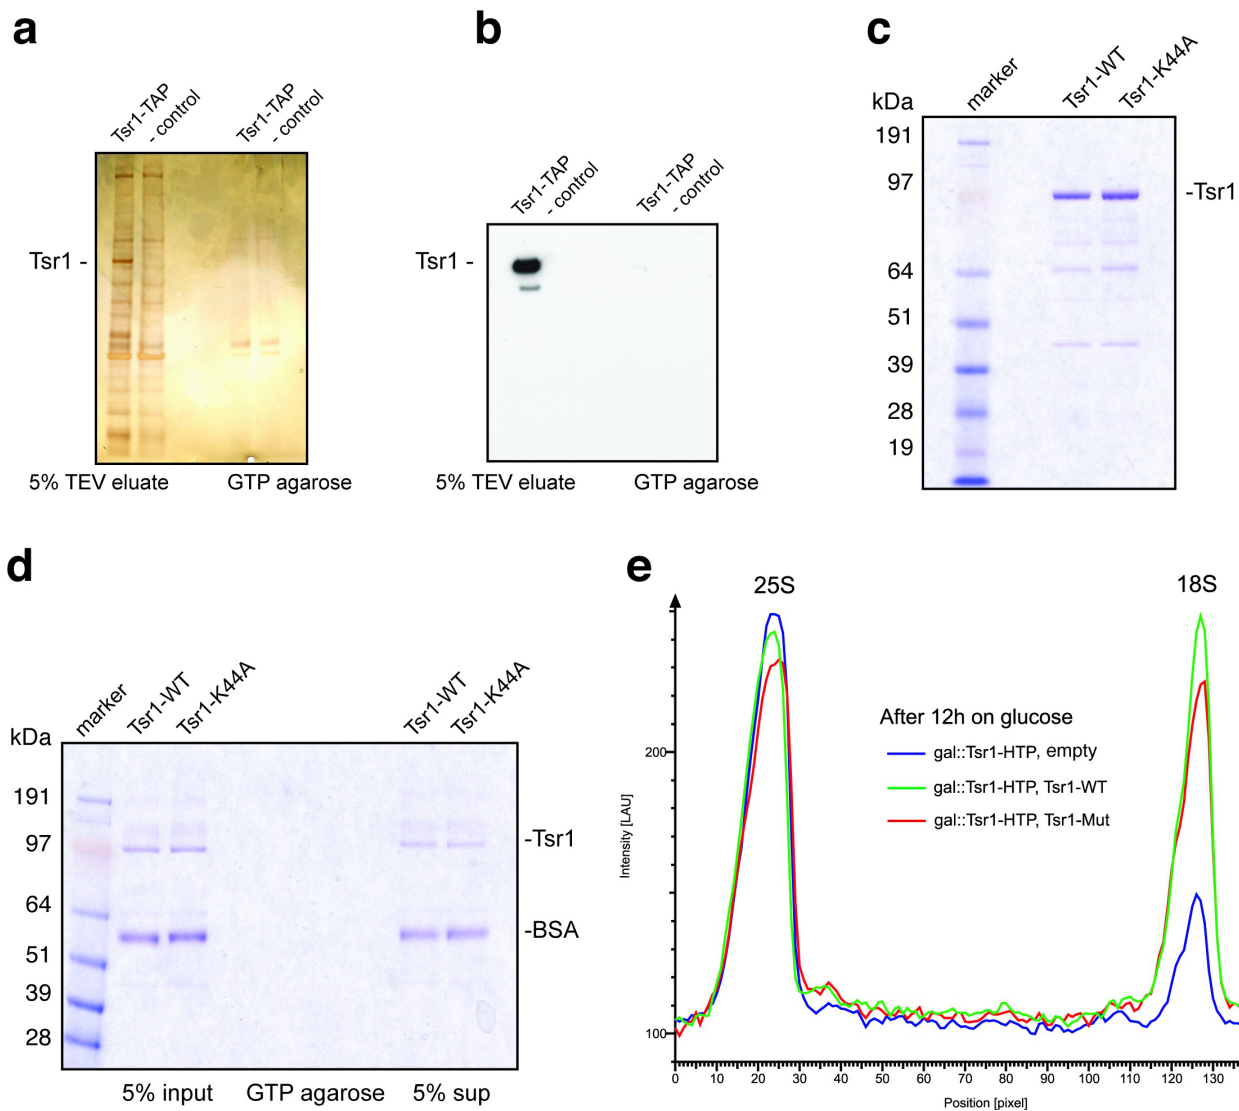

**Supplementary Figure 2** Tsr1 lacks apparent GTP binding and GTPase activity. **(a,b)** HTP-tagged Tsr1 can be purified using IgG as shown by silver staining **(a)** and western blot with anti-TAP antibody **(b)**, but not by GTP-agarose affinity purification. **(c)** Recombinant GST-fusion proteins, purified from *E.coli*, of either Tsr1-WT or Tsr1-K44A. The mutation is in the Tsr1 GTGK domain, which is similar to the GSGK p-loop involved in nucleotide binding by active GTPases. **(d)** The GST-fusion proteins did not purify on GTP-agarose beads which indicated a lack of GTP binding for both Tsr1 WT and the Tsr1 mutant. **(e)** Analysis of 25S and 18S rRNA, isolated after 12 h depletion of 3HA-TSR1-HTP, from strains transformed with empty plasmid (blue), or plasmids expressing Tsr1-WT (green) or Tsr1-Mut(K44A) (red). Depletion of endogenous Tsr1 results in a decrease of 18S rRNA (blue) whereas expression of only Tsr1 carrying the putative active-site point mutant supports normal pre-rRNA processing (red).

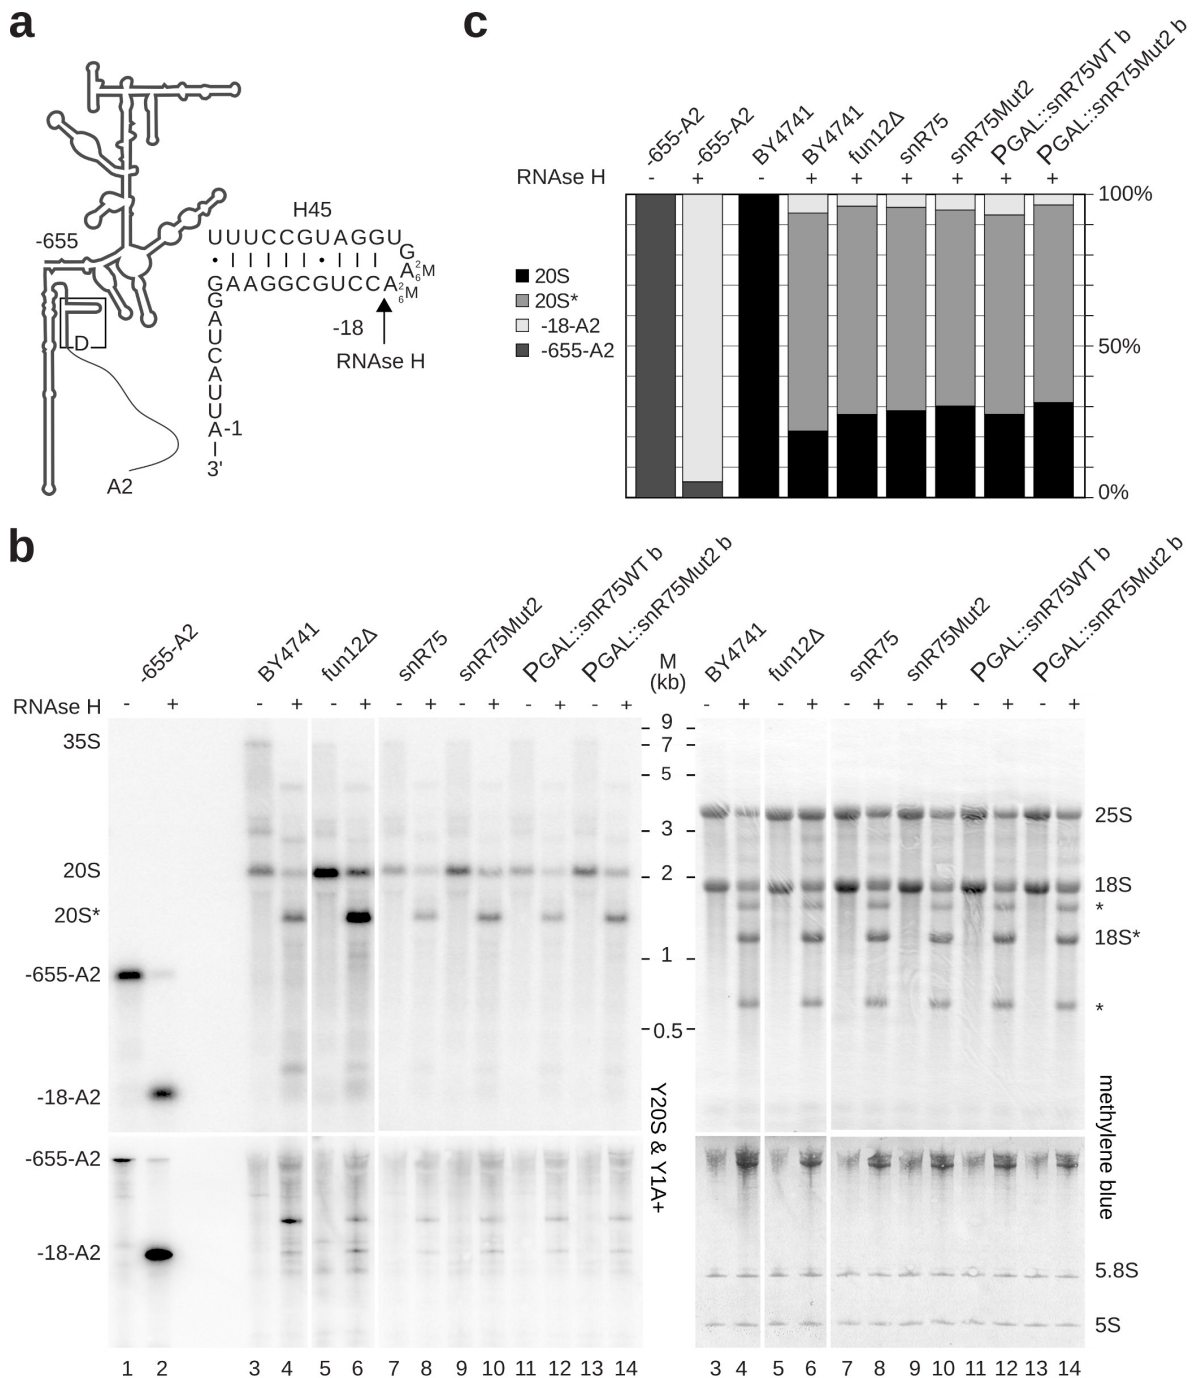

**Supplementary Figure 3** 20S pre-rRNA accumulating when Fun12 is absent or when its 25S rRNA binding is impaired has undergone cytoplasmic methylation. **(a)** Overview of the 3' domain of 18S rRNA with helix 45 (boxed) enlarged showing A1781 and A1782 that are dimethylated in the cytoplasm. **(b)** Dimethylation of A1781 and A1782 was probed by site-directed RNase H cleavage with oligo A2M for BY4741 (lanes 3, 4), fun12Δ (lanes 5, 6) or BY4741ΔsnR72-78 expressing the indicated snoRNA genes (lanes 7-14; see Supplementary Fig. 5a). Unmodified 20S accumulating in the nucleus would be cleaved producing an -18-A2 fragment (numbering is relative to site D) as observed with an in vitro synthesized -655-A2 fragment (mixed with *E. coli* RNA; lanes 1, 2). RNAs, separated on 1.2 % agarose (top) or 8% PAA/Urea (bottom), were visualized with probes Y1A+ and Y20S (left panels) or methylene blue (right panels). Nonspecific cleavage within 18S at ~600 nt upstream of site D yielded 18S\* and 20S\*. An RNA ladder was run alongside (M). **(c)** 20S derived species were quantified in comparison to -655-A2. In contrast to over 90% cleavage of in vitro synthesized RNA, less than 10% -18-A2 fragment was released from 20S pre-rRNAs indicating almost complete modification.

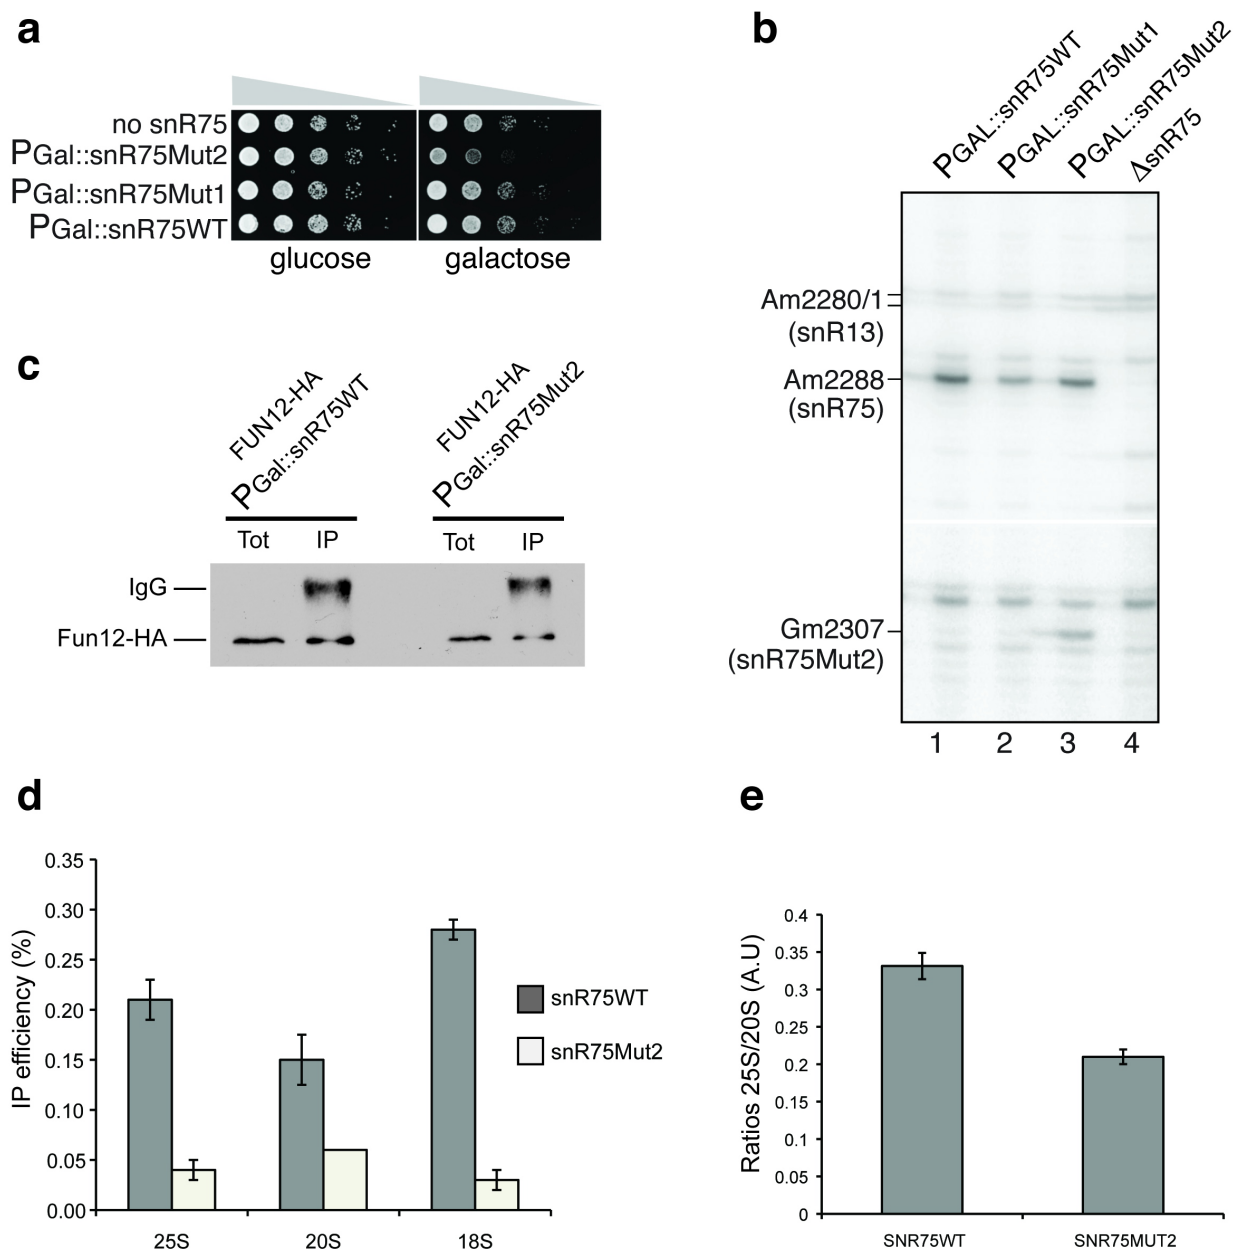

**Supplementary Figure 3** 25S methylation at G2307 affects growth and Fun12 ribosome association. (a) Analysis of the effects of expression of wild-type or mutant snR75 on cell growth. YPHΔsnR78-72 cells transformed with plasmids lacking snR75 or expressing the galactose inducible expression cassettes for snR75, snR75Mut1 or snR75Mut2 were spotted in ten-fold serial dilutions and incubated for two days at 30°C. (b) Analysis of RNA extracted from strain expressing different snR75 mutants. Methylation was analyzed by primer extension with reduced dNTP concentrations, which induces arrest at sites of 2'-O-methylation. (c) Mutations in snR75 do not affect immunoprecipitation of Fun12-HA with anti-HA from a strain in which deletion of the endogenous copy of SNR75 was complemented by snR75 or snR75Mut2 (as in panel (a)). (d) Coprecipitation of pre-rRNA and mature rRNAs with Fun12 from cells expressing snR75 or snR75Mut2 were quantified using northern hybridization data. (e) Ratios between 25S and 20S rRNAs co-precipitated with PTH-NOB1 from cells expressing snR75WT or snR75Mut2. Amounts of 25S and 20S co-purified were quantified by EtBr staining and normalized according to their relative lengths.

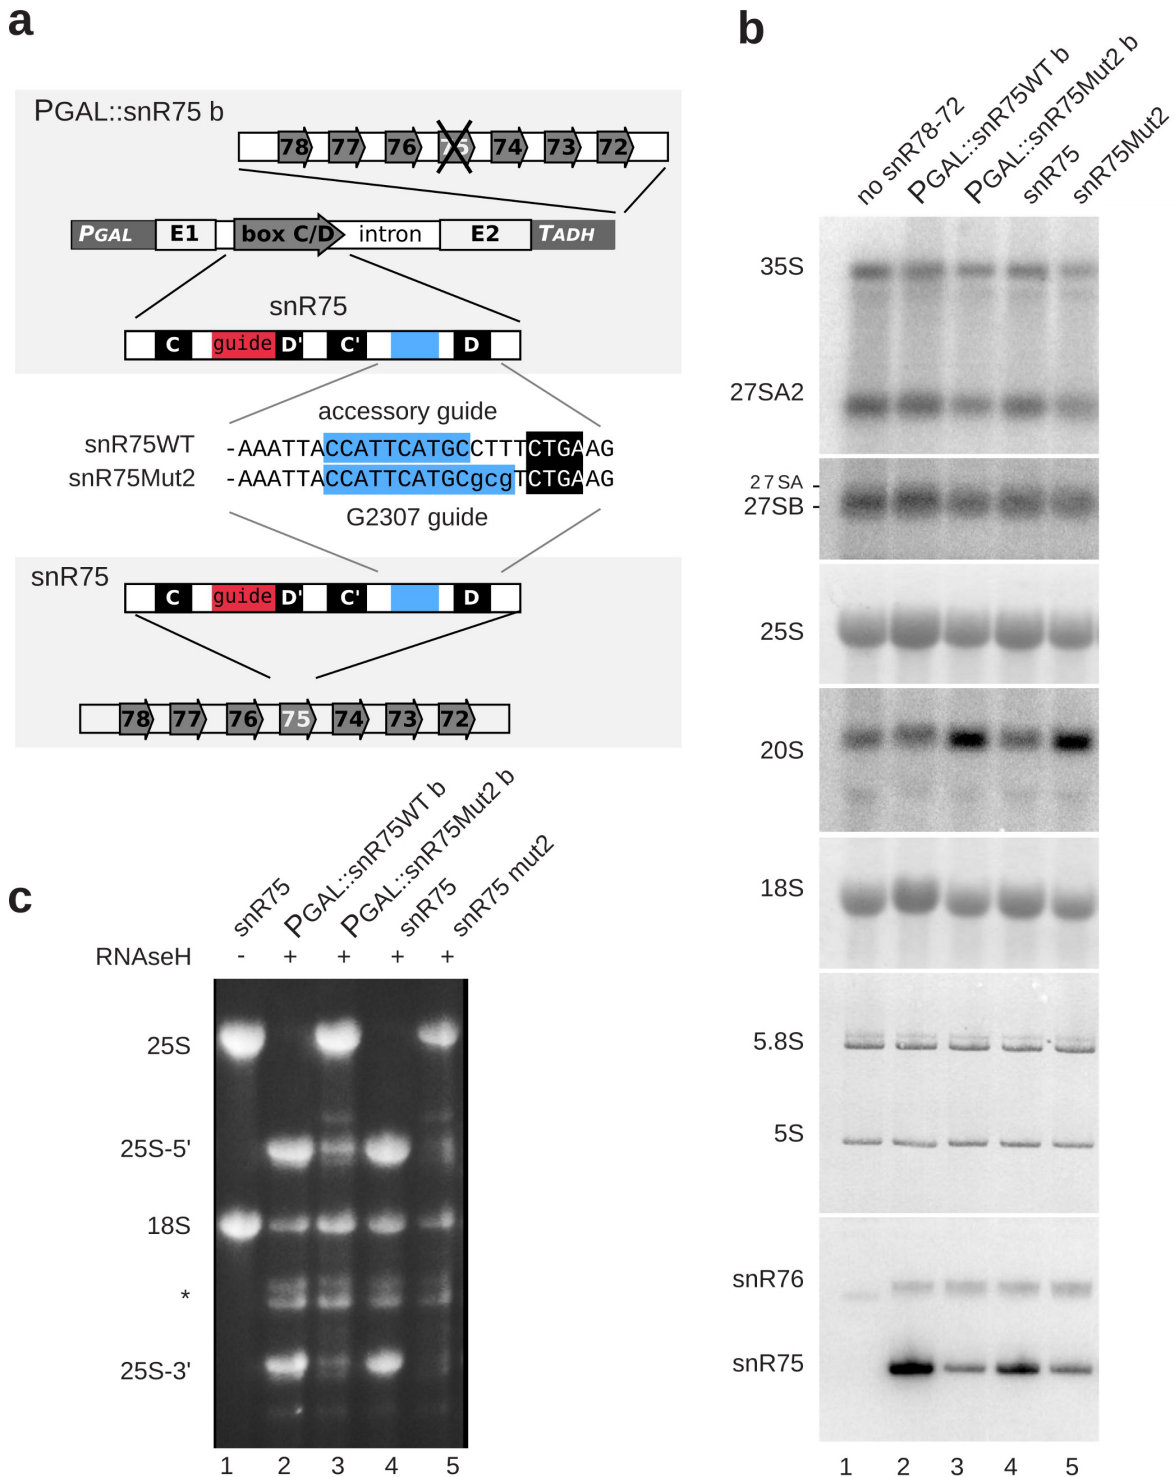

**Supplementary Figure 4** Accumulation of 20S pre-rRNA by 25S methylation at G2307 does not depend on the context of expression of snR75Mut2. **(a)** The snR78-72 cluster was reinstated into the strains in which it had been disrupted. For this, the cluster lacking the gene for snR75 was inserted into the plasmids expressing the galactose-inducible expression cassettes for snR75 or snR75Mut2 (top) or the complete cluster was cloned into pRS416 (bottom) with the Mut2 mutation introduced after sitedirected mutagenesis. **(b)** Expression of snR75Mut2 leads to a block of 20S pre-rRNA processing as shown by northern blot analysis with probe Y1a (detecting 20S, 35S pre-RNAs), when compared to 27SA2 or 27SB pre-rRNAs (with Y27SA2, or Y2a, respectively). The levels of snoRNAs were determined with probes snR75-5' and snR76. **(c)** Methylation of G2307 by snR75Mut2 fully protects 25S rRNA against site-specific RNase H cleavage with oligo aG2307rnh as 25S rRNA remains intact and no significant amounts of specific cleavage products (25S-5' and 25S-3') were formed. Mature rRNAs were visualized by EtBr **(b)** or methylene blue staining **(c)**.

**Supplementary Table 1** Strains used in this study.

| Name   | Description                                        | Genotype                                                                                                                       | Source                |
|--------|----------------------------------------------------|--------------------------------------------------------------------------------------------------------------------------------|-----------------------|
| ySLD34 | GAL::NOB1                                          | <i>MATa; his3Δ1; leu2Δ0; met15Δ0; ura3Δ0; GAL1::3HA::NOB1; Kan<sup>R</sup></i>                                                 | This Study            |
| YSLD11 | GAL::NOB1, PTH-NOB1                                | <i>MATa; his3Δ1; met15Δ0; ura3Δ0; GAL1::3HA::NOB1; pRS415-PTH-NOB1; Kan<sup>R</sup></i>                                        | This Study            |
| YSLD57 | GAL::FUN12                                         | <i>MATa; his3Δ1; leu2Δ0; met15Δ0; ura3Δ0; GAL1::3HA::FUN12; Kan<sup>R</sup></i>                                                | This Study            |
| YSLD67 | GAL::FUN12, FUN12-HTP                              | <i>MATa; his3Δ1; met15Δ0; ura3Δ0; GAL1::3HA::FUN12; pRS415-FUN12-HTP; Kan<sup>R</sup></i>                                      | This Study            |
| YSLD68 | GAL::FUN12, FUN12 <sub>T439A</sub> -HTP            | <i>MATa; his3Δ1; met15Δ0; ura3Δ0; GAL1::3HA::FUN12; pRS415-FUN12<sub>T439A</sub>-HTP; Kan<sup>R</sup></i>                      | This Study            |
| YSLD69 | GAL::Fun12, PTH-NOB1                               | <i>MATa; met15Δ0; ura3Δ0; GAL1::3HA::NOB1; GAL1::3HA::FUN12; pRS415-PTH-NOB1; Kan<sup>R</sup></i>                              | This Study            |
| YSLD73 | GAL::Fun12, PTH-NOB1, empty                        | <i>MATa; met15Δ0; GAL1::3HA::NOB1; GAL1::3HA::FUN12; pRS415-PTH-NOB1; pRS426; Kan<sup>R</sup></i>                              | This Study            |
| YSLD72 | GAL::Fun12, PTH-NOB1, fun12-high                   | <i>MATa; met15Δ0; GAL1::3HA::NOB1; GAL1::3HA::FUN12; pRS415-PTH-NOB1; pRS426-ADH1::FUN12; Kan<sup>R</sup></i>                  | This Study            |
| YSLD74 | GAL::Fun12, PTH-NOB1, fun12 <sub>D533N</sub> -high | <i>MATa; met15Δ0; GAL1::3HA::NOB1; GAL1::3HA::FUN12; pRS415-PTH-NOB1; pRS426-ADH1::FUN12<sub>D533N</sub>; Kan<sup>R</sup></i>  | This Study            |
| YSLD70 | GAL::Fun12, PTH-NOB1, fun12-low                    | <i>MATa; met15Δ0; GAL1::3HA::NOB1; GAL1::3HA::FUN12; pRS415-PTH-NOB1; pRS416-Met25::FUN12; Kan<sup>R</sup></i>                 | This Study            |
| YSLD71 | GAL::Fun12, PTH-NOB1, fun12 <sub>D533N</sub> -low  | <i>MATa; met15Δ0; GAL1::3HA::NOB1; GAL1::3HA::FUN12; pRS415-PTH-NOB1; pRS416-Met25::FUN12<sub>D533N</sub>; Kan<sup>R</sup></i> | This Study            |
| YSLD75 | YPHΔsnR78-72                                       | <i>MATa ura3-52 lys2-801_amber ade2-101_ochre leu2Δ1 his3-Δ200 trp1-Δ63; snr78-72::NAT; NatR</i>                               | van Nues et al. 2011  |
| YSLD80 | ΔsnR78-72                                          | <i>MATa; his3Δ1; leu2Δ0; met15Δ0; ura3Δ0; snr78-72::NAT; NatR</i>                                                              | This Study            |
| YSLD81 | ΔsnR78-72, snr75, FUN12-HA                         | <i>MATa; leu2Δ0; met15Δ0; snr78-72::NAT; pRS416 pGAL1-snr75; FUN12-HA::HIS3; Nat<sup>R</sup></i>                               | This Study            |
| YSLD82 | ΔsnR78-72, snr75Mut2, FUN12-HA                     | <i>MATa; leu2Δ0; met15Δ0; snr78-72::NAT; pRS416 pGAL1-snr75Mut2; FUN12-HA::HIS3; Nat<sup>R</sup></i>                           | This Study            |
| D1089  | TSR1-HTP                                           | <i>MATa; his3Δ1; leu2Δ0; met15Δ0; TSR1-HTP</i>                                                                                 | Granneman et al. 2010 |
| D1100  | GAL::TSR1-HTP                                      | <i>MATa; his3Δ1; leu2Δ0; met15Δ0; GAL1::Tsr1-HTP; Kan<sup>R</sup></i>                                                          | This Study            |
| D1101  | GAL::TSR1-HTP 3HA-TSR1 <sub>WT</sub>               | <i>MATa; his3Δ1; leu2Δ0; met15Δ0; GAL1::Tsr1-HTP, p3HA-TSR1, Kan<sup>R</sup></i>                                               | This Study            |
| D1102  | GAL::TSR1-HTP 3HA-TSR1 <sub>K44A</sub>             | <i>MATa; his3Δ1; leu2Δ0; met15Δ0; GAL1::Tsr1-HTP, p3HA-TSR1<sub>K44A</sub>, Kan<sup>R</sup></i>                                | This Study            |

All strains generated in this study were derived from BY4741 (*MATa; his3Δ1; leu2Δ0; met15Δ0; ura3Δ0*) except YSDL75, which is derived from YPH499.

**Supplementary Table 2** Oligonucleotides used in this study.

| Name         | Sequence (5'-3')                                                        |
|--------------|-------------------------------------------------------------------------|
| Tsr1 S1      | CAGAAATTTATTTGTTAGTTGAAGAGCGGTAGTTTTACGCAGGCATCAGAATGCGTACGCTGCAGGTCGAC |
| Tsr1 S2      | TAAGATTTGTGTCCGTTTTTTAATGATGACCTGTGTGAATGACCTGCCATCGATGAATTCTCTGTCTG    |
| Fun12 F2     | GGCTGCTATTGAAGAAGCTGAAGGTCGTTTTCGGCATCGAACGGATCCCCGGGTTAATTAA           |
| Fun12 R1     | GTAGAATGTGATTGGGTTGACAAGTCAGCGTATGCCATGCGCATAGGCCACTAGTGGATC            |
| Fun12 F5     | CACACCGTAATATCCCATCTTAAAAGTGAAAACTCTTATGAATTCGAGCTCGTTTAAA              |
| Fun12 R5     | CATCCCAGTAGTTCTGTGGTCTTTTTACTCTTTTTTCGCGCACTGAGCAGCGTAATCTG             |
| FUN12 Xma1 a | GGGGGCCCGGGCTGCGAAAAAGAGTAAAAAGAACCAACAGAACTACTGGG                      |
| Fun12 Xma1 b | GGGGGCCCGGGTCATTTCGATGCCGAAAACGACCTTCAGCTTCTTCAATAG                     |
| Fun12T439A1  | GGTGGTGAAGCTGGTGGCATCGCCCAACAGATTGGTGCCAC                               |
| Fun12T439A2  | GTGGCACCAATCTGTTGGGCGATGCCACCAGCTTCACCACC                               |
| Fun12D533N1  | CATTTGTCTGTTGCCCTAAACAAAATTAATAGATTATATGACTGGAAAGCCATTC                 |
| FUN12D533N2  | GAATGGCTTCCAGTCATATAATCTATTAATTTGTTTAGGGCAACGACAAATG                    |
| Probe 004    | CGGTTTTAATTGTCCTA                                                       |
| Probe 005    | ATGAAAACCTCCACAGTG                                                      |
| Probe 006    | AGATTAGCCGCAGTTGG                                                       |
| Probe 011    | TCTCTTCCAAAGGGTCTG                                                      |
| Probe 012    | GCACCGAAGGTACCAG                                                        |
| ITS1RT       | CCATCTCTTGCTTCTTGCCCAG                                                  |
| Y1a          | TTAAGCGCAGGCCCGGCTGG                                                    |
| Y27SA2       | CCGATTGCTCGAATGCCCAA                                                    |
| Y58          | CAAACAGGCATGCCCCCT                                                      |
| Y2a          | GTATCACTCACTACCAAACAGAATG                                               |
| snR76        | TTTCTAGGCCCGCTAAAGCATTGTCA                                              |
| snR75-5'     | GTCATCTATAAATATCTCATCATA                                                |
| map75        | CTAGATAGTAGATAGGGACAGTGG                                                |
| aG2307rnh    | mAmUmGCGCGmUmCmAmCmUmAmAmUmUmAmGmA                                      |
| Y20S         | GAAATCTCTCACCGTTTGAATAGCA                                               |
| Y1A+         | ACTTAAGCGCAGGCCCGGCTGGACT                                               |
| A2M          | mAmGmGTTCAmCmCmUmAmCmGmGmAmAmAmC                                        |
| ITS1FISH     | TTGCACAGAAATCTCTcy3CACCGTTTGAATcy3AGCAAGAAAGAAACTcy3TACA                |

**Supplementary Note** The potential for a conformational switch involving helix 44 in 18S rRNA and ITS1 is not conserved.

As shown in Supplementary Fig. 1 no significant conservation of the complementarity to the implicated 18S regions can be discerned in the ITS1 from *Pezizomycotina* or *Schizo-saccharomyces* (**b**) or in an alignment of 11 mammalian, ~1 kb long, very GC-rich spacer sequences (data not shown) in which the proposed 18S-interacting regions or A2 cleavage sites in rat or human ITS1<sup>2</sup> do not line up. The ITS1 regions in the three groups of fungi do not appear to share a common secondary structure<sup>1,4-6</sup>, while the ITS1 from *Verticillium albo-atrum*, a plant-pathogen belonging to the *Pezizomycotina*, blocks 35S pre-rRNA processing when substituted for the normal ITS1 in a *S. pombe* pre-rRNA transcript<sup>7</sup> suggesting incompatible processing machineries between these groups of fungi. Sequences nearby A2 or containing A3 in *S. pombe* ITS1<sup>6</sup> appear conserved among *Schizo-saccharomyces* whereas in the *Pezizomycotina* ITS1, AC-rich sequences flank a branched stem-loop, reminiscent of the *S. cerevisiae* A2-A3 organization. For all *Saccharomyces* apart from *Clavispora lusitanae* (Clus) three structural elements can be modeled: a helical domain II with a conserved tip, a stem-loop downstream of A2, and helix III with a fairly well conserved base (indicated by brackets in panels (**b**) or (**c**)). The whole of domain II, rather than its conserved tip (which is protected against DMS modification by the presence of Nob1 or Rrp5 in vitro<sup>3</sup>) is required for normal growth but not pre-rRNA processing<sup>4</sup>. The proposed stem-loop 3' to site A2 is phylogenetically and experimentally supported<sup>1,4,5</sup> (data not shown). The helix IV (gray box in panel (**d**) and gray lines above ITS1 alignment in panel (**b**)) is neither common nor essential<sup>4</sup>. However, as revealed by this pile-up, this region harbors the remnant of an element (GUCUGA) conserved in the other two groups of fungi. As shown in panel (**c**), in *S. cerevisiae* the previously proposed ITS1-18S base-pairing required either multiple G-U interactions<sup>2,3</sup> or non-conserved base-pairing<sup>1,4</sup> (data not shown). The high conservation of the 18S sequence among *Saccharomyces* limits the potential for compensatory base changes. The only nucleotide altered, a C (against gray background) to a G, is not expected to interact with ITS1. This provides, however, a compensatory change for maintaining perfect base-pairing within helix 44 itself (data not shown). Several ITS1 nucleotides that could potentially form interactions (blue underlined) are not aligned with the residues in *S. cerevisiae* and the internal bulges in the resulting ITS1/18S helices are not predicted to be favorable for helix formation. In most cases, mismatches (in reverse contrast) interrupt the putative base-pairing. Only among the *Sensu Strictu Saccharomyces* species, *S. mikatae* (Smik), *S. bayanus* (Sbay), *S. kudravezii* (Skud), and *S. paradoxus* (Spar), is the proposed 18S-ITS1 interaction fully conserved. Overall, the phylogenetic comparisons indicate that a conformational switch involving ITS1 and 18S rRNA<sup>2</sup> is unlikely in organisms that are not closely related to *S. cerevisiae*.



## Supplementary References

1. Yeh, L.-C.C., Thweatt, R. & Lee, J.C. Internal transcribed spacer 1 of the yeast precursor ribosomal RNA. Higher order structure and common structural motifs. *Biochemistry* **29**, 5911-5918 (1990).
2. Lamanna, A.C. & Karbstein, K. An RNA conformational switch regulates pre-18S rRNA cleavage. *J. Mol. Biol.* **405**, 3-17 (2011).
3. Young, C.L. & Karbstein, K. The roles of S1 RNA-binding domains in Rrp5's interactions with pre-rRNA. *RNA* **17**, 512-521 (2011).
4. Van Nues, R.W. et al. Separate structural elements within internal transcribed spacer 1 of *Saccharomyces cerevisiae* precursor ribosomal RNA direct the formation of 17S and 26S rRNA. *Nucleic Acids Res.* **22**, 912-929 (1994).
5. Allmang, C. et al. Recognition of cleavage site A2 in the yeast pre-rRNA. *RNA* **2**, 51-62 (1996).
6. Lalev, A.I. & Nazar, R.N. Conserved core structure in the internal transcribed spacer 1 of the *Schizosaccharomyces pombe* precursor ribosomal RNA. *J. Mol. Biol.* **284**, 1341-1351(1998).
7. Good, L., Intine, R.V. & Nazar, R.N. Interdependence in the processing of ribosomal RNAs in *Schizosaccharomyces pombe*. *J. Mol. Biol.* **273**, 782-8 (1997).
